# Supplementary material
Source: PubMed Central journal article supplement (PMC4961257)
Supplement: NIHMS804230-supplement-Supp_Info.pdf [file NIHMS804230-supplement-Supp_Info.pdf]

**Table S1.** Interacting chains used as prediction targets.

|                     |        |        |        |         |        |        |        |
|---------------------|--------|--------|--------|---------|--------|--------|--------|
| 1a2xAB <sup>1</sup> | 1ds6AB | 1go4BF | 1kgyAE | 1lofhAG | 1sq0AB | 1wmhAB | 2assBC |
| 1a9nAB              | 1dtdAB | 1gpqAD | 1ki1BA | 1lofuAX | 1sq2LN | 1wmiCD | 2atqAB |
| 1acbEI              | 1dx5MI | 1gpwAB | 1klfBA | 1ohzAB  | 1stfEI | 1wpxAB | 2auhAB |
| 1agrAE              | 1e0fDI | 1gvnBA | 1kpsAB | 1oiuAB  | 1sv0AC | 1wq1RG | 2aw2AB |
| 1aisBA              | 1e44BA | 1gxdAC | 1kshAB | 1ol5AB  | 1svxBA | 1wr6AE | 2ayoAB |
| 1aroPL              | 1e96AB | 1gzsAB | 1ktkEA | 1oo0AB  | 1syxAB | 1wrdAB | 2b3tBA |
| 1avaAC              | 1eaiBD | 1h2sAB | 1ktzBA | 1ophAB  | 1t0fAC | 1wywAB | 2b4sAB |
| 1avgHI              | 1ebdBC | 1h4lAD | 1ku6AB | 1oqdAK  | 1t6bXY | 1x3wAB | 2b59AB |
| 1avwAB              | 1eerBA | 1h59AB | 1kxqAH | 1oqeAK  | 1t6gAC | 1x86AB | 2b5iBA |
| 1axiBA              | 1eerCA | 1h6kAX | 1kz7AB | 1or7AC  | 1t9gDS | 1xb2AB | 2b5iCA |
| 1ay7AB              | 1efnAB | 1h9dAB | 1kzyCA | 1oryAB  | 1ta3BA | 1xd3AB | 2bcjAQ |
| 1b0nAB              | 1efuCD | 1h9hEI | 1l4dAB | 1otsAC  | 1tafAB | 1xdkBA | 2bfxAD |
| 1b34AB              | 1ewyAC | 1he1AC | 1l6xAB | 1oxbAB  | 1tbrKS | 1xdtTR | 2bh1AX |
| 1b6cAB              | 1f02IT | 1he8AB | 1l7vAC | 1oyvBI  | 1tdqAB | 1xg2AB | 2bkhAB |
| 1bh9BA              | 1f34AB | 1h16BA | 1ldjAB | 1oyvAI  | 1telAB | 1xk4BD | 2bkkAB |
| 1blxAB              | 1f3vBA | 1hx1AB | 1lfdBA | 1p5vAB  | 1th1AC | 1xl3AC | 2bkrAB |
| 1bmlCA              | 1f5qAB | 1i1rAB | 1lpbBA | 1p8vAC  | 1th8AB | 1xouBA | 2bo9AB |
| 1bndAB              | 1f60AB | 1i2mBA | 1ltxAR | 1p9mCB  | 1tk5AB | 1xqsAC | 2bseFC |
| 1brsAD              | 1f6fBA | 1i7wCD | 1m1eAB | 1p9MAB  | 1tmqAB | 1xtgAB | 2btfAP |
| 1buhAB              | 1f6fCA | 1i8lAC | 1m27AC | 1pk1AB  | 1tnrAR | 1xu1AR | 2c1mAB |
| 1buiAC              | 1f6mAC | 1iarBA | 1m2vBA | 1ppfEI  | 1tocBR | 1y4hAC | 2c2vHT |
| 1bvnPT              | 1f93BE | 1ib1AE | 1m9fAD | 1pqlAB  | 1tt5AB | 1y64AB | 2c5dAC |
| 1bzqAL              | 1fbvAC | 1ibrBA | 1ma9AB | 1pqzAB  | 1tueAB | 1y8xAB | 2c5dAD |
| 1clxAB              | 1fccBD | 1i1lEA | 1mbxAC | 1pufAB  | 1tx4AB | 1yCSAB | 2ckhAB |
| 1c4zAD              | 1ffgAB | 1im3AD | 1moxAC | 1pvhAB  | 1tx6AI | 1yvbAI | 2ey4AE |
| 1c9pAB              | 1fleEI | 1iraYX | 1mq8AB | 1pxvAC  | 1txqAB | 1z0jAB | 2ey4AC |
| 1cd9BA              | 1fm9AD | 1itbBA | 1mr1AD | 1qa9AB  | 1tygAB | 1z2cBA | 2f9dAP |
| 1cf7BA              | 1foeAB | 1ixsBA | 1mvfAE | 1qavBA  | 1u0sYA | 1z3eAB | 2fi4EI |
| 1ci6AB              | 1fqjAB | 1iyjBA | 1mzwAB | 1qbkBC  | 1u7fAB | 1z3gHA | 2g45AB |
| 1clvAI              | 1fqJCA | 1j2jAB | 1n0wAB | 1qo3AC  | 1uadAC | 1z5yED | 2gooAC |
| 1cseEI              | 1fr2BA | 1jatAB | 1nbfAD | 1r0rEI  | 1ueaAB | 1z92AB | 2gy7AB |
| 1cxzAB              | 1fs1BA | 1jchAB | 1nexBA | 1rlkAD  | 1ughEI | 1zbdAB | 2hppHP |
| 1d2zBA              | 1fyhAB | 1jdhAB | 1nf3AC | 1r4aAE  | 1ujwAB | 1zbxAB | 2mtaCA |
| 1d3bAB              | 1g3nAC | 1jiwPI | 1nkpAB | 1r8sAE  | 1ukvGY | 1zc3AD | 2sniEI |
| 1d4xAG              | 1g3nAB | 1jk9BA | 1nmuAB | 1rp3AB  | 1ul1XA | 1zlhAB | 2trcBP |
| 1d6rAI              | 1g4uSR | 1jmaAB | 1npeAB | 1rzrCT  | 1us7AB | 1zm2AB | 3fapAB |
| 1devAB              | 1g6vAK | 1jowBA | 1nqlAB | 1s1qAB  | 1usuAB | 2a0lAD | 3hhrCA |
| 1df9BC              | 1g73AC | 1jtdAB | 1nt2BA | 1s3sFG  | 1uuzAD | 2a19BA | 3proAC |
| 1df9AC              | 1gc1GC | 1jtgAB | 1nu9AC | 1s4yBA  | 1uw4BA | 2a41AC | 3sicEI |
| 1dfjEI              | 1gcqAC | 1jtpAL | 1nunBA | 1s6vAB  | 1uzxAB | 2a42AB | 3ygsCP |
| 1dhkAB              | 1gcqBC | 1jw9BD | 1nvuSR | 1sbbAD  | 1v5iAB | 2a5dBA | 4cpaAI |
| 1dkfBA              | 1gh6BA | 1k5dAB | 1nvuSQ | 1sgfGB  | 1v74AB | 2a5tAB | 4htcHI |
| 1dkgDA              | 1ghqAB | 1k8rAB | 1nw9BA | 1sgpEI  | 1vetAB | 2a5yBA | 4sgbEI |
| 1dmlAB              | 1gl0EI | 1k90AD | 1o6sAB | 1shwAB  | 1vg0AB | 2a78BA |        |
| 1dn1AB              | 1gl1AI | 1k93AD | 1o94AC | 1shyBA  | 1wliAF | 2ajfAE |        |
| 1dowAB              | 1gl4AB | 1kacAB | 1oc0AB | 1shzAC  | 1w1wCG | 2apoAB |        |
| 1dp5AB              | 1glbFG | 1kg0BC | 1oeyJA | 1sppAB  | 1w98AB | 2assBA |        |

<sup>1</sup> First four symbols are the PDB code, followed by the chain IDs of receptor and ligand.

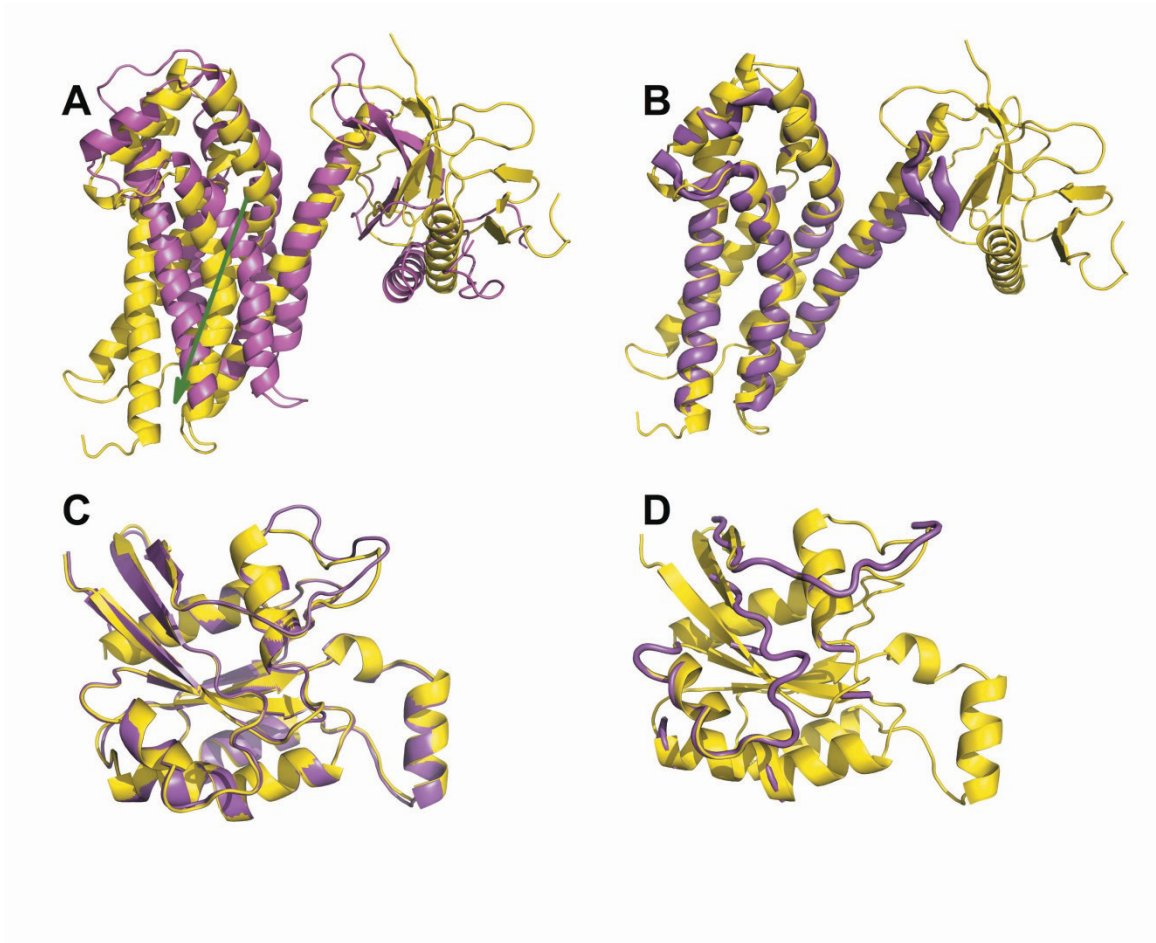

**Figure S1.** *Structural similarity in hetero-complexes with domain structure.* (A) Alignments of the receptors (chains B of the target 1ki1 and template 2nz8) by FSA and (B) PSA. (C) Alignments of the ligands (chains A) by FSA and (D) PSA.

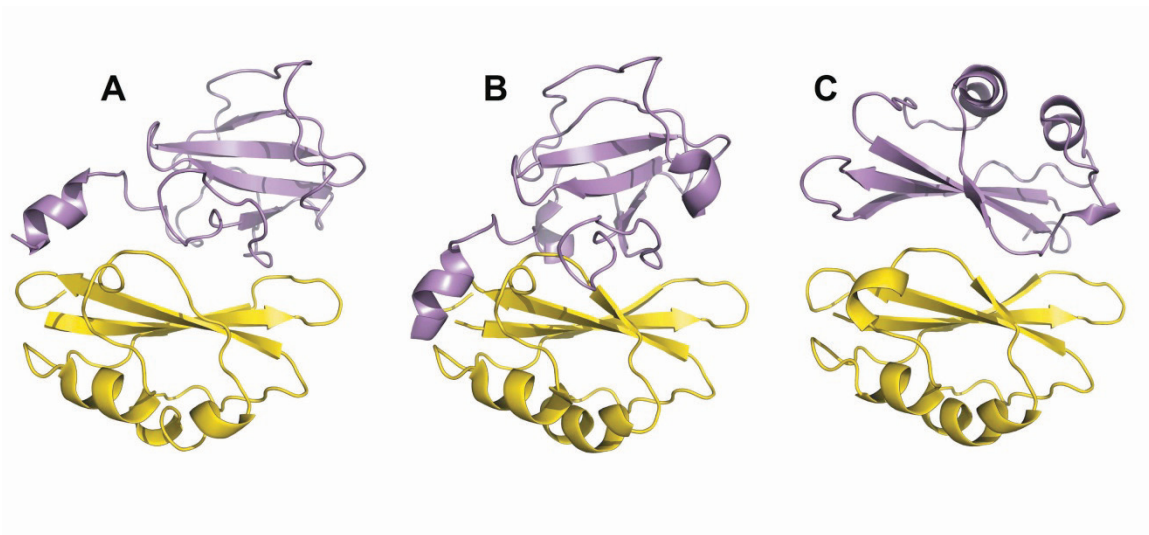

**Figure S2.** *Structural similarity of biological and crystal packing interfaces.* (A) PSA model and (B) X-ray structure of the biologically functional complex (1e44, chains A and B). (C) X-ray structure of the crystal-packing complex (3eip, chains A and B).

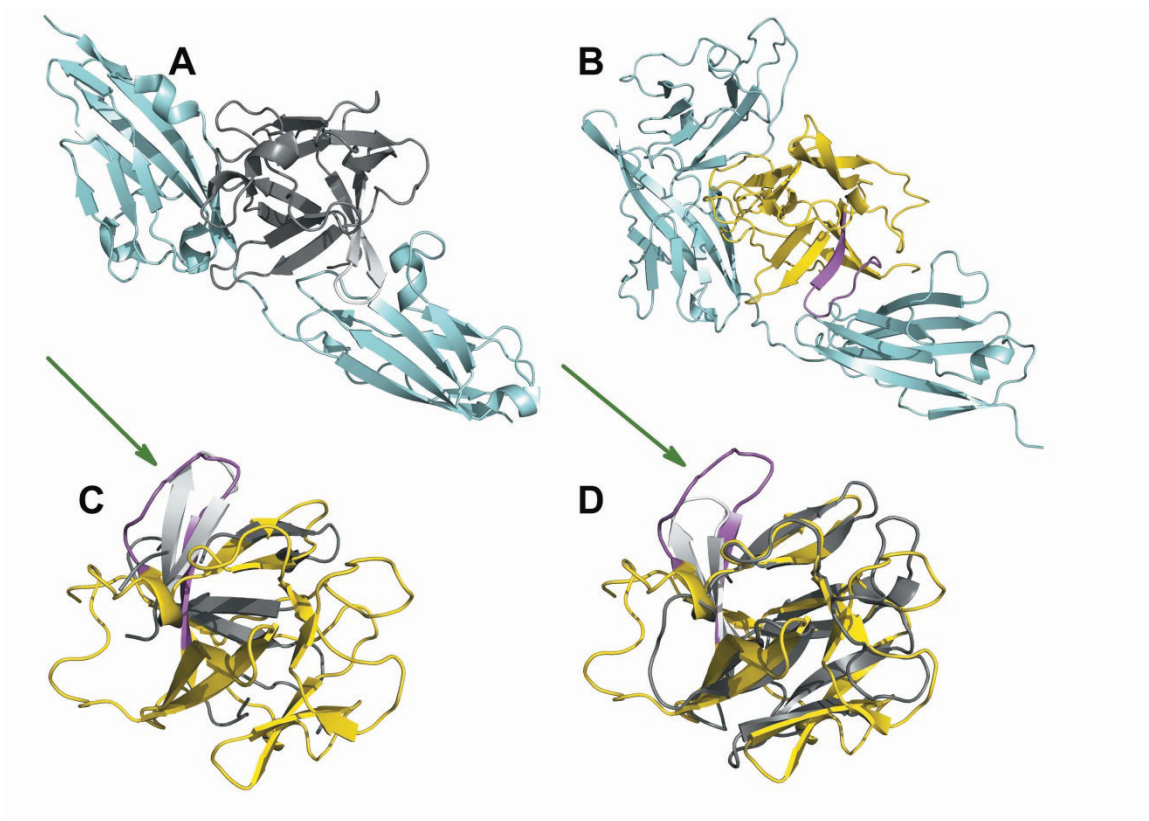

**Figure S3.** *Dissimilar interface loops.* (A) X-ray structures of the template (chains A and C from 1cvs) and (B) the target (chains A and B from 1itb). (C) PSA and (D) FSA alignments of the target and the template ligands. The receptors are in cyan, target ligands are in gray and template ligands in yellow. Parts of ligand  $\beta$ -strands essential for the model building are in magenta for the target and white for the template, and marked by arrows in C and D.

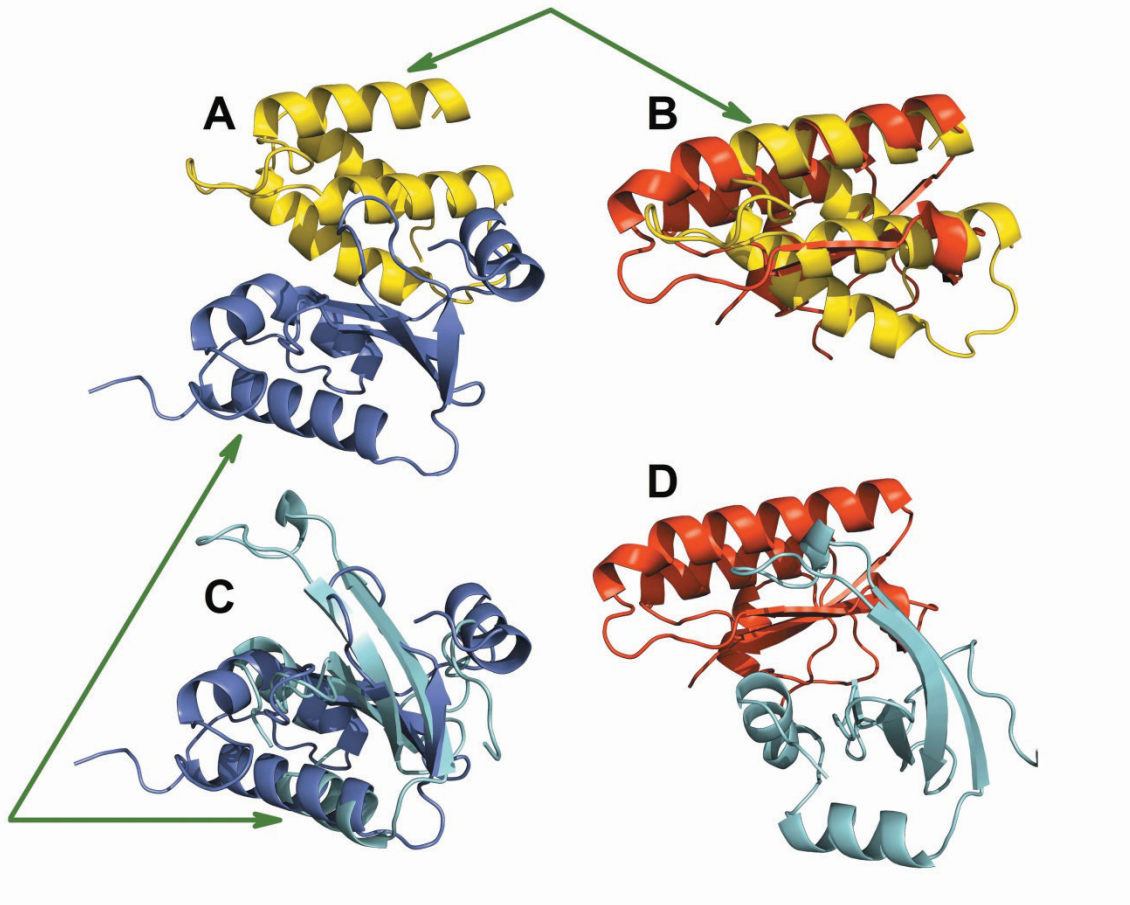

**Figure S4.** *Local structural similarity away from the interface.* (A) X-ray structures of the target (chains A and B of 1v74) and (D) template 2fhz (chains A and B of 2fhz). (B) FSA alignments of the ligands and (C) receptors.
